# Supplementary material
Source: MDPI journal article supplement (https://www.mdpi.com/2076-3417/9/17/3471)

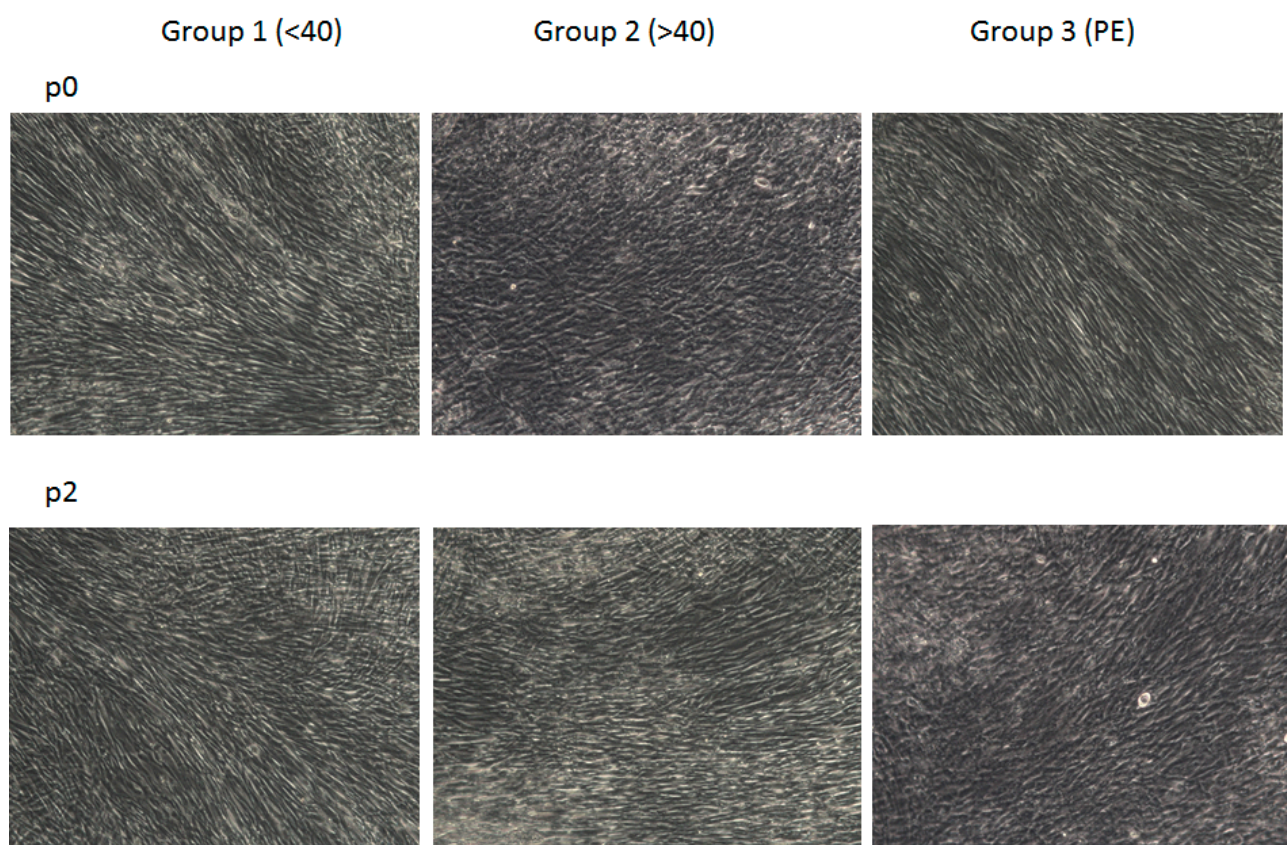

**Figure S1.** Morphology of hAMSCs of the three Groups at p0 and p2.

Supplement: s1 [file s1]
